# Supplementary material for: Heterogeneity in the Metastatic Microenvironment: JunB-Expressing Microglia Cells as Potential Drivers of Melanoma Brain Metastasis Progression
Source: MDPI journal article supplement (doi:10.3390/cancers15204979), 2023-10-13
Supplement: s1 [file s1]

**Supplementary Table S1.** List of antibodies utilized in the study.

| <b>Antibody</b>                                                  | <b>Catalogue no.</b> | <b>Origin<sup>1</sup></b> | <b>Application</b>   | <b>Concentration</b> | <b>Manufacturer details</b>                       |
|------------------------------------------------------------------|----------------------|---------------------------|----------------------|----------------------|---------------------------------------------------|
| Polyclonal Anti-AIF-1/Iba1                                       | NB100-1028           | Goat                      | IHC (frozen)<br>FACS | 1:70<br>1:50         | Novus Biologicals, Centennial, CO, USA            |
| Polyclonal Anti- $\beta$ -tubulin                                | ab6046               | Rb                        | WB                   | 1:1000               | Abcam, Cambridge, MA, USA                         |
| Monoclonal Anti-CD14, REAfinity™                                 | 130-110-578          | Human                     | FACS                 | 1:50                 | from Miltenyi Biotec, Bergisch Gladbach, Germany  |
| Monoclonal Anti-CD16, REAfinity™                                 | 130-113-951          | Human                     | FACS                 | 1:50                 | from Miltenyi Biotec, Bergisch Gladbach, Germany  |
| Monoclonal Anti-CD150 (SLAM), REAfinity™                         | 130-099-722          | Human                     | FACS                 | 1:50                 | from Miltenyi Biotec, Bergisch Gladbach, Germany  |
| Monoclonal Anti-CD163, REAfinity™                                | 130-112-287          | Human                     | FACS                 | 1:50                 | from Miltenyi Biotec, Bergisch Gladbach, Germany  |
| Monoclonal Anti-gp130                                            | sc-9994              | Ms                        | FACS                 | 1:20                 | Sana Cruz Biotechnology, Inc., Dallas, TX, USA    |
| Monoclonal Anti-JunB                                             | 3753                 | Rb                        | IHC (frozen)<br>FACS | 1:100<br>1:50        | Cell Signaling Technology, Inc., Danvers, MA, USA |
| Polyclonal Anti-LIFR $\beta$                                     | 22779-1-AP           | Rb                        | FACS                 | 1:50                 | Proteintech, Rosemont, IL, USA                    |
| Multiclonal Anti-melanoma (targets HMB45, MART-1 and Tyrosinase) | ab733                | Ms                        | IHC (frozen)         | 1:100                | Abcam, Cambridge, MA, USA                         |
| Monoclonal Anti-PD-L1                                            | 393602               | Ms                        | FACS                 | 1:50                 | BioLegend, San Diego, CA, USA                     |
| Monoclonal Anti-phospho-STAT3 (Tyr705)                           | 9145                 | Rb                        | WB                   | 1:1000               | Cell Signaling Technology, Inc., Danvers, MA, USA |
| Monoclonal Anti-Stat3                                            | 9139                 | Ms                        | WB                   | 1:500                | Cell Signaling Technology, Inc., Danvers, MA, USA |

<sup>1</sup>Ms: mouse, Rb: rabbit
